# Supplementary material for: Breast cancer chemotherapy induces vascular dysfunction and hypertension through a NOX4-dependent mechanism
Source: JCI journal article supplement (doi:10.1172/jci149117), 2022-05-26
Supplement: sd1 [file 1]

301 Moved Permanently

# Moved Permanently

The document has moved here.
